# Supplementary material
Source: PubMed Central journal article supplement (PMC4746487)
Supplement: supp_115.067504_Supplemental_67504.pdf [file supp_115.067504_Supplemental_67504.pdf]

**Supplemental Material:**

**Article title: Regulation of Hepatic Drug-metabolizing Enzymes in Germ-free mice by Conventionalization and Probiotics**

**Authors: Felcy Selwyn, Sunny Lihua Cheng, Curtis D. Klaassen, and Julia Yue Cui**

**Journal: Drug Metabolism and Disposition**

**Figure s1**

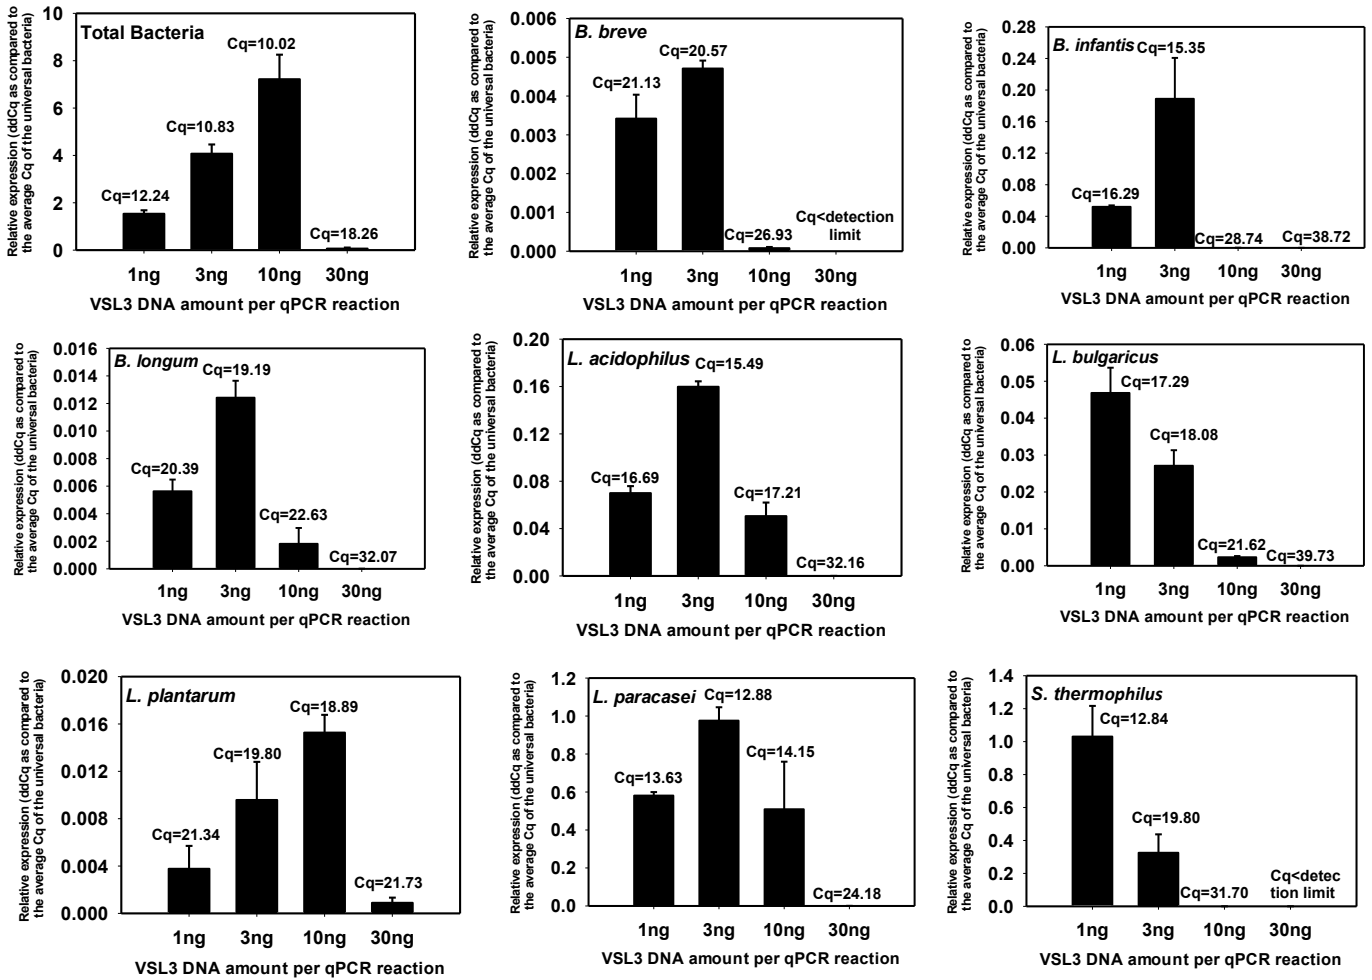

Figure s2

**Cyp4f gene cluster**

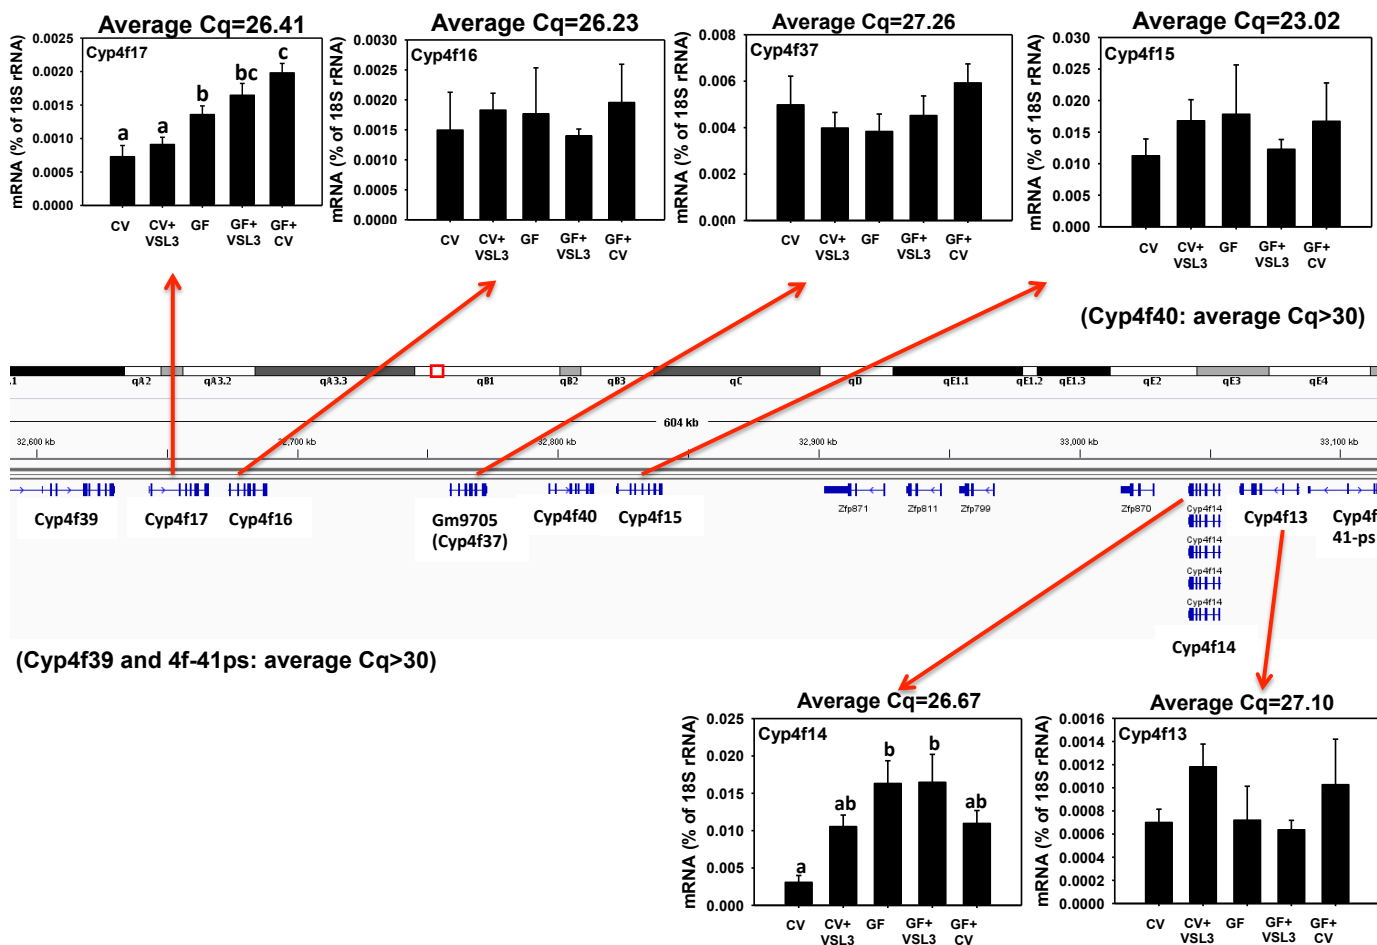

Figure s3

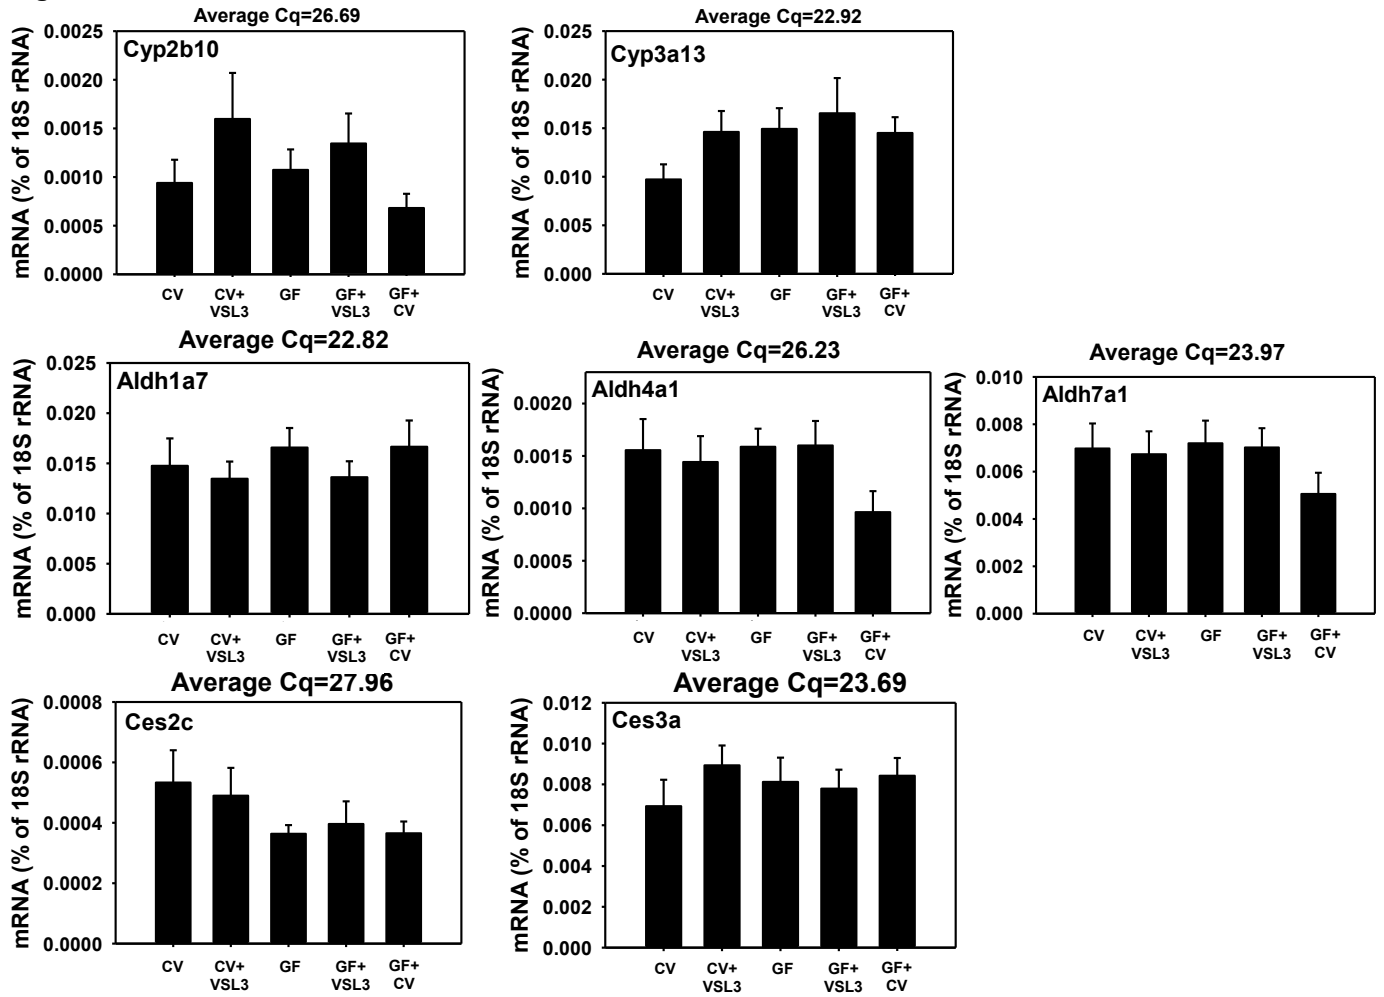

**Figure s4**

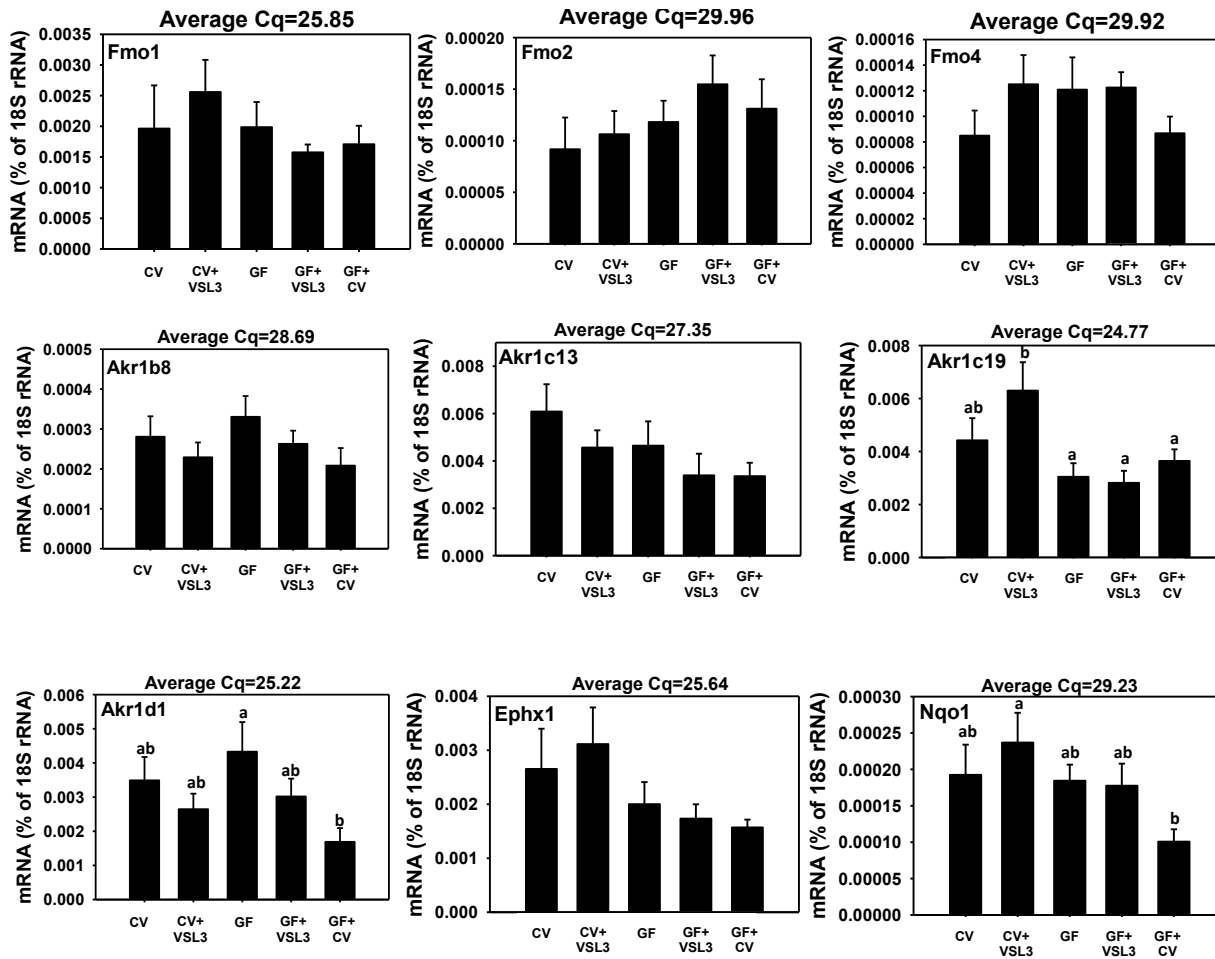

**Figure s5**

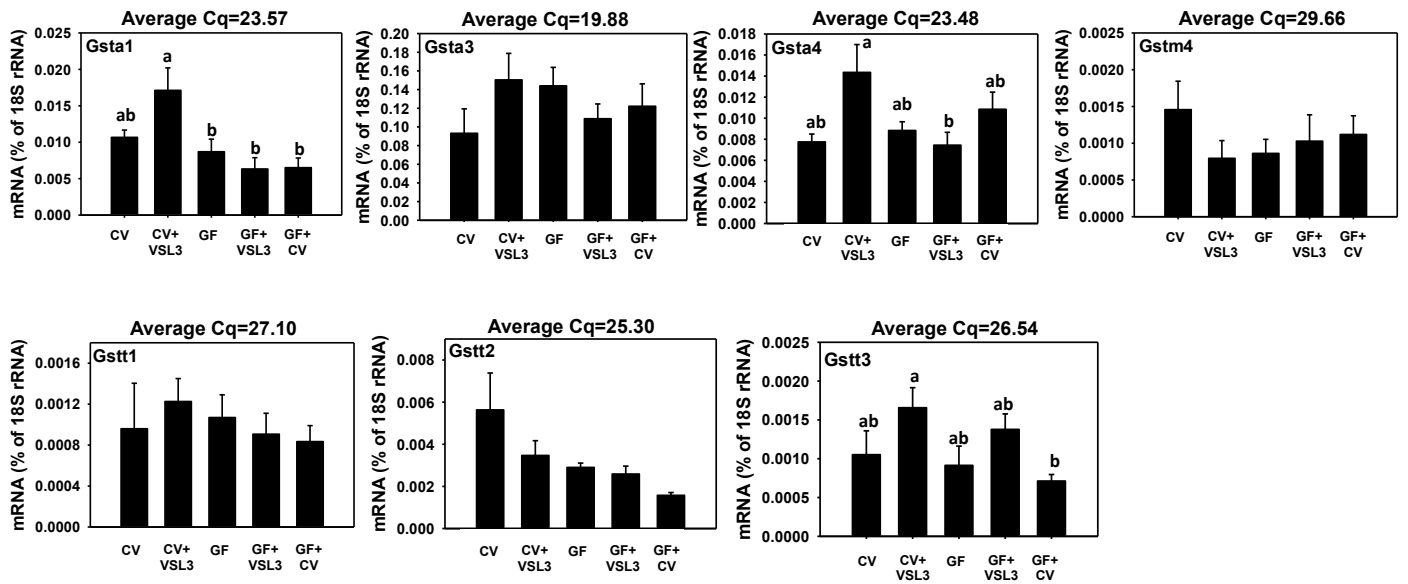

**Figure s6**

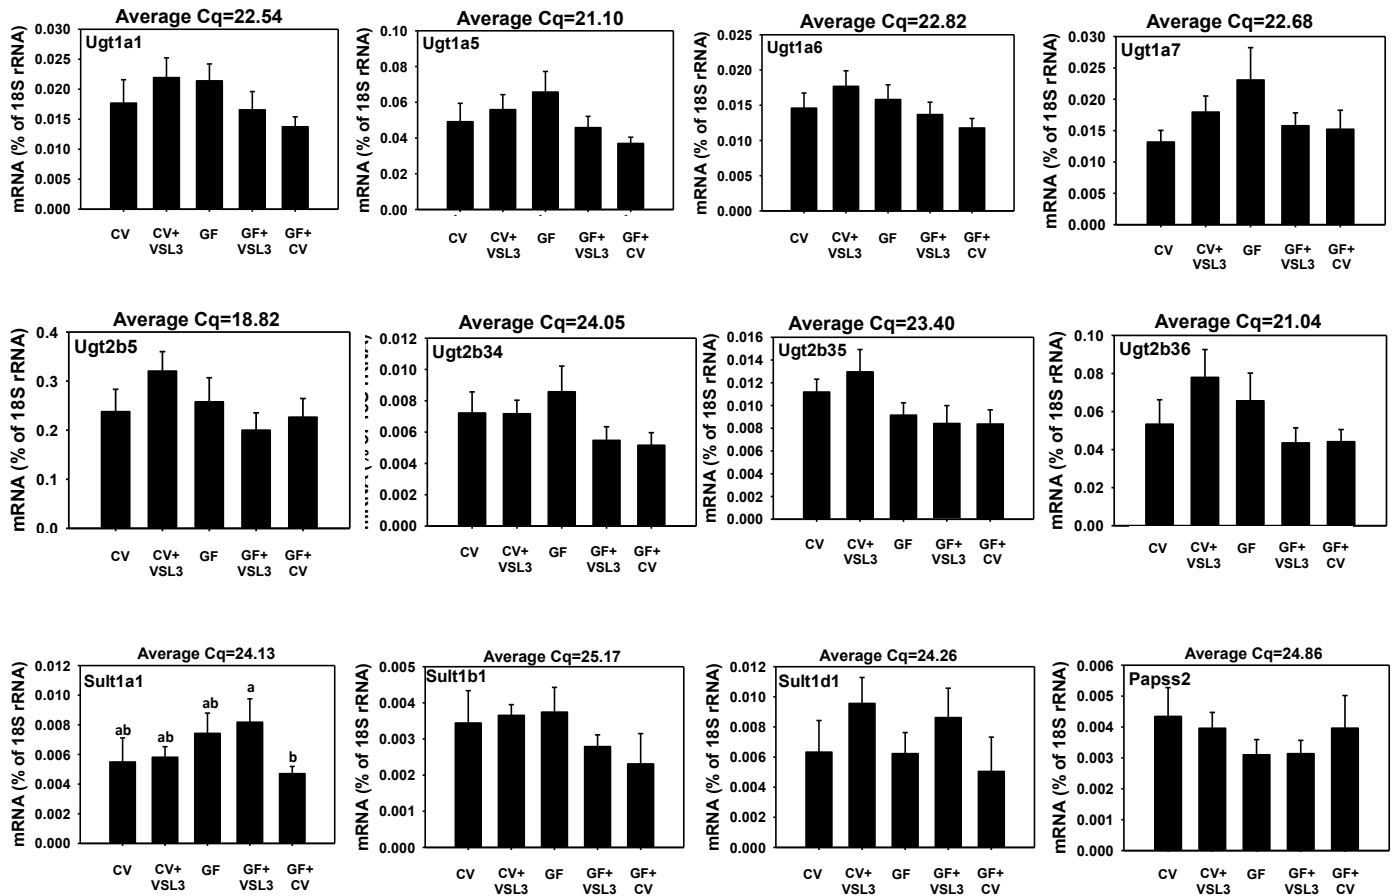

Figure s7

PXR binding fold-enrichment to *Cyp3a* loci in mouse liver

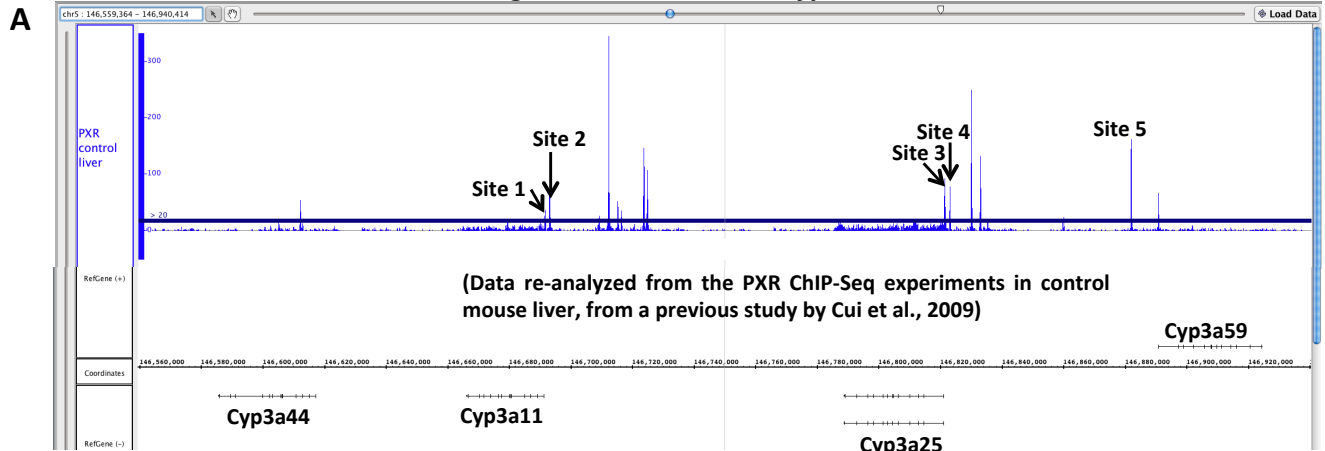

PPAR $\alpha$ -binding to *Cyp4a* loci in liver

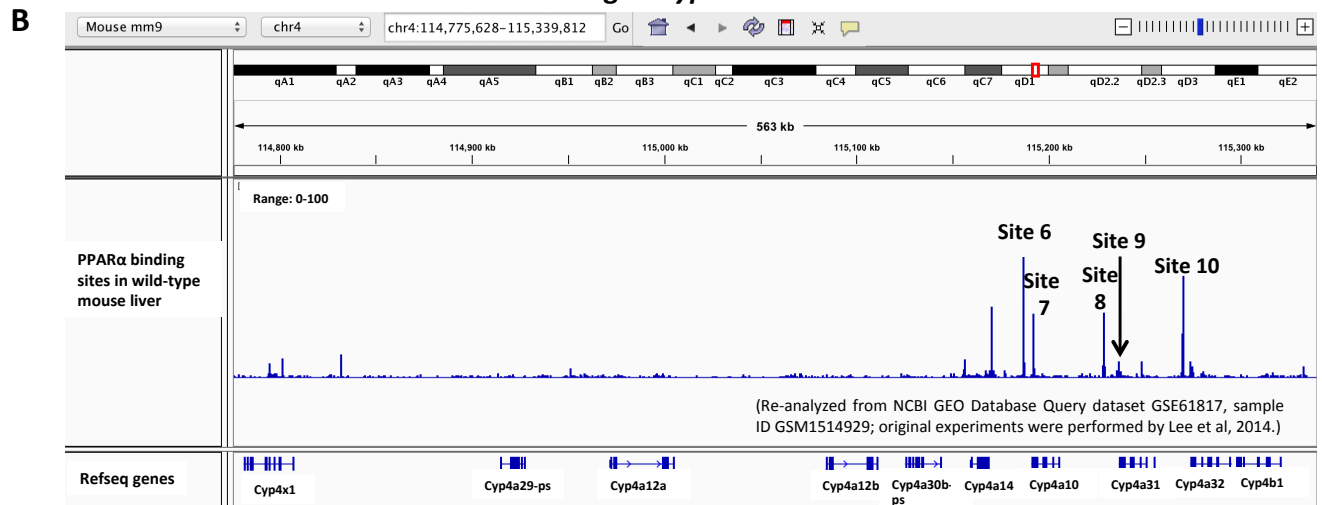



**Table s1. Primer Sequences and Specificity for the bacterial 16S rRNA quantification.**

| Bacterial 16S rRNA targeted  | Primer sequences               | Cross-reactivity                                                                                                                                                                                                                                                                                                                                                                                                                                                                                                                                    |
|------------------------------|--------------------------------|-----------------------------------------------------------------------------------------------------------------------------------------------------------------------------------------------------------------------------------------------------------------------------------------------------------------------------------------------------------------------------------------------------------------------------------------------------------------------------------------------------------------------------------------------------|
| <b>Universal bacteria</b>    | Forward: GTGSTGCAYGGYTGTCTGTC  | Universal                                                                                                                                                                                                                                                                                                                                                                                                                                                                                                                                           |
|                              | Reverse: ACGTCRTCCMCACCTTCCCTC |                                                                                                                                                                                                                                                                                                                                                                                                                                                                                                                                                     |
| <b><i>L. acidophilus</i></b> | Forward: AGCGAGCTGAACCAACAGAT  | <b><i>L. acidophilus</i></b> NBRC13951, VPI6032, JCM1132, and BCRC10695 strains.                                                                                                                                                                                                                                                                                                                                                                                                                                                                    |
|                              | Reverse: TGATCATGCGATCTGCTTTC  | <b><i>L. acidophilus</i></b> strains NCFM, NBRC 13951, VPI 6032, JCM 1132, and BCRC 10695;<br><b><i>L. crispatus</i></b> strains DSM 20584, ST1, NBRC 15019, ATCC 33820;<br><b><i>L. helveticus</i></b> strains DPC 4571, NBRC 15019, DSM 20075;<br><b><i>L. gallinarum</i></b> strains ATCC 33199, JCM 2011;<br><b><i>L. ultunesis</i></b> strains CCUG 48460, Kx146C1;<br><b><i>L. kitasatonis</i></b> strain JCM 1039.                                                                                                                           |
| <b><i>L. plantarum</i></b>   | Forward: TTTGAGTGAGTGGCGAACTG  | <b><i>L. plantarum</i></b> strains CIP WCFS1, CIP 103151, NBRC 15891, JCM 1149, NRRL B-14768, subsp. argentoratensis strain DKO22, DSM 10667, JCM 1149;<br><b><i>L. paraplantarum</i></b> strain DSM 10667;<br><b><i>L. mudanjiangensis</i></b> strain 11050;<br><b><i>L. fabifermentans</i></b> strains DSM 21115, LMG 24284;<br><b><i>L. xiangfangensis</i></b> strain 3.1.1;<br><b><i>L. pentosus</i></b> strain 124-2.                                                                                                                          |
|                              | Reverse: CCAAAGTGATAGCCGAAGC   | <b><i>L. plantarum</i></b> strains WCFS1, CIP 103151, NBRC 15891, JCM 1149, NRRL B-14768, subsp. argentoratensis strain DKO 22;<br><b><i>L. paraplantarum</i></b> strain DSM 10667;<br><b><i>L. xiangfangensis</i></b> strain 2.1.1;<br><b><i>L. pentosus</i></b> strain 124-2.                                                                                                                                                                                                                                                                     |
| <b><i>B. longum</i></b>      | Forward: TTTTGTGGAGGGTTCGATTC  | <b><i>B. longum</i></b> strains subsp. suis strain ATCC 227533, ATCC 15707; NCC2705 strain NCC2705;<br><b><i>B. bifidum</i></b> S17 strain S17; <i>B. breve</i> ACS-0710V Sch8b strain ACS-071-V-Sch8b;<br><b><i>B. animalis</i></b> subsp. Lactis AD011 strain AD011;<br><b><i>B. adolescentis</i></b> strain ATCC15703                                                                                                                                                                                                                            |
|                              | Reverse: GGAGCTATTCCGGTGTATGG  | <b><i>B. longum</i></b> strains subsp. Suis strain ATCC 27533, ATCC15070, NCC2705 strain NCC2705, KCTC3128, subsp. Infantis strain ATCC 15697;<br><b><i>B. dentium</i></b> strain B764, Bd1 strain Bd1,<br><b><i>B. moukalabense</i></b> strain GG01;<br><b><i>B. stercoris</i></b> strain Eg1;<br><b><i>B. adolescentis</i></b> strain ATCC15703;<br><b><i>B. pseudocatenulatum</i></b> strain B1279;<br><b><i>B. catenulatum</i></b> strain DSM 16992;<br><b><i>B. ruminantium</i></b> strain Ru 687;<br><b><i>B. indicum</i></b> strain JCM1302. |
| <b><i>B. breve</i></b>       | Forward: CTGAGATACGGCCAGACTC   | Many including <b><i>B. breve</i></b> strains                                                                                                                                                                                                                                                                                                                                                                                                                                                                                                       |
|                              | Reverse: ACAAAGTGCCTTGCTCCCTA  | <b><i>B. breve</i></b> strains DSM 20213 and ACS-071-V-Sch8b strain ACS-071-V-Sch8b                                                                                                                                                                                                                                                                                                                                                                                                                                                                 |
| <b><i>L. paracasei</i></b>   | Forward: CGAGATTCAACATGGAACGA  | <b><i>L. paracasei</i></b> strains ATCC334 strain ATCC 334, NBRC 15889, ATCC25302, subsp. Tolerans strain NBRC 15906, R094                                                                                                                                                                                                                                                                                                                                                                                                                          |
|                              | Reverse: AGCTTACGCCATCTTTCAGC  | <b><i>L. paracasei</i></b> strains NBRC 15889, ATCC 25302, subsp. Tolerans strain NBRC 15906, R094;<br><b><i>L. rhamnosus</i></b> GG strain GG (ATCC 53103), NBRC 3425, JCM 1136;<br><b><i>L. casei</i></b> ATCC 334 strain ATCC 334;<br><b><i>L. saniviri</i></b> strain YIT 12363;<br><b><i>L. zeae</i></b> strain RIA 482                                                                                                                                                                                                                        |
| <b><i>L. bulgaricus</i></b>  | Forward: CAAGTTTGAAGCGGCGTA    | <b><i>L. delbrueckii subsp. Bulgaricus</i></b> strains ATCC 11842, NBRC 13953, ATCC 11842                                                                                                                                                                                                                                                                                                                                                                                                                                                           |
|                              | Reverse: TTGCTCCATCAGACTTGCGT  | Many including <b><i>L. delbrueckii subsp. Bulgaricus</i></b> strains                                                                                                                                                                                                                                                                                                                                                                                                                                                                               |

Table S2 RT-qPCR primer sequences

| Gene Symbol   | Forward                   | Reverse                                                |
|---------------|---------------------------|--------------------------------------------------------|
| 18S           | CGAAGTCTGCCCTCAACTT       | CCGGAATCGAACCTTGATT                                    |
| Adh1          | GTTGAGAGCGTTGGAGAAGG      | TCGCTTCGGTACAAAAGTT                                    |
| Akr1b8        | TCCTCTTTGCTGATGCACAC      | GCAACAGTCTGCCCTGGTT                                    |
| Akr1c13       | CCTTCCAGCAGAGTTCCTTG      | ACTGTCCACACAGGGGACA                                    |
| Akr1c19       | TTGCCTACTGTGCTCTTGA       | CAATCTGAGCTGGAATCGC                                    |
| Akr1d1        | GAGTGCCACCCGATTTCAC       | CAAGGGTGGAGAAGAGACGT                                   |
| Aldh1a1       | CTCTGTTCCCCAGGTGTTGT      | CATGCAAGGGTGCCTTTATT                                   |
| Aldh1a7       | TGCTATTGGCTGTCCCTGT       | ACCATGTTGGCCAGTCTC                                     |
| Aldh1b1       | GAACATCAGTGAAGACGC        | CAACTGTCTCCATTGCCAA                                    |
| Aldh3a1       | CCCCTGGCACTCTATGTTT       | GTGGGCACAGTGTGAAC                                      |
| Aldh3a2       | CACCACCAAGCTGTGTG         | AAGATGCTCTGAGTGCCTT                                    |
| Aldh4a1       | GGAAGGAGACAGCTGGTG        | GGAGCTAGCACAGACCAGG                                    |
| Aldh7a1       | TGAAGAACCTCGGAAAG         | TTCCCATCTCCAAGACAC                                     |
| Ces1e/1g      | TTGCTGGCTGAAACCACC        | CTTTGGCAGCAACTCCAT                                     |
| Ces2a         | GTACTGGCCAAATTCGAA        | GTCCGTGAGAACCCTTGACT                                   |
| Ces2c         | AGGAATGGCTTCCATGTTT       | AGGTATCCCCAGTTGCCTCT (also recognizes Ces2a and Ces2h) |
| Ces3a         | CACAGACCAGTGTAAATG        | TTGATCTGGCATCTCTCAC                                    |
| Cyp1a2        | GACATGCCCTAACGTGAG        | GGTCAGAAAAGCCGTGGTTG                                   |
| Cyp2b10       | AAGGAGAAGTCAACCAGCA       | CTCTGCAACATGGGGTACT                                    |
| Cyp2a11       | ACAACAAGCAGGAGTGGAC       | GGTAGAGGAGCACAAGCTG                                    |
| Cyp2a13       | AAGTACTGGCCAGAGCCTGA      | AATGCAGTCTTCTGGTCCAC                                   |
| Cyp3a16       | GTATGAAACCACCCAGCAGCA     | AGGTATTCATGCCATCAC                                     |
| Cyp3a41a/b    | AGCAGAAGCACCAGTTGAT       | GACTGGGCTGTGATCCAT                                     |
| Cyp3a44       | CTGAGCTTCTCAGTGTCTGTGCA   | CCCATGAGAAAAGCGTGAAGCA                                 |
| Cyp3a57       | TCTACTCTCTCATCGGACCCCG    | GGTTGCCTGCTGATCTCACAGGG                                |
| Cyp3a59/25    | AGTACTGGCCAGAGCCTCAA      | TCGTTCTCTGCTGAACCT                                     |
| Cyp4a10       | CACACCCTGATCACCACAG       | TCCTTGATGCACATTGTGGT                                   |
| Cyp4a12a/b    | CTCATTCTGCCCTTCTCAG       | GGATGGGGATGGGACTCT                                     |
| Cyp4a14       | CTGGGTGATGAACTCTGT        | CATCTGGGAAGTGAACAGT                                    |
| Cyp4a29       | TGATGGGAGCAGCTTGTCTG      | GGTCCGAGTGTAGCCAAA                                     |
| Cyp4a30b      | GGTGATACTGGGGCATCAG       | GAGGGCAATCTGGTCCACA                                    |
| Cyp4a31       | TGGAGCAGCCTCTCTGGCT       | GGGCGGTGATGGGAAGTGT                                    |
| Cyp4a32       | TCTGCTTAAAGCCGACCCGA      | GCAGCAGGAGCAGACCAGC                                    |
| Cyp4b1        | CTGCATGGCCCTTATCCTA       | GAAGCATCTCTCATGCACA                                    |
| Cyp4f13       | TATCTCACTGCTGATGSGCG      | AGGAATCAACCCCTGCGT                                     |
| Cyp4f14       | GTCACTGGGCATGTAAGT        | TCGACGATGTAGAAATGGC                                    |
| Cyp4f15       | GACAGGGAAACAGCAGTTGT      | ATCTCGCTAGACACTTCCCT                                   |
| Cyp4f16       | GGCAGAGCTGACACCTTA        | ATCTCTCAGGCTCTCGGTG                                    |
| Cyp4f17       | TGATACCTTGGACAGCTTG       | AAGGTACAGGAAGGGCTGGT                                   |
| Cyp4f18       | GAGGAGATTGAATGGACGA       | GGGAGCAAAATGCTGAGT                                     |
| Cyp4f37       | ACTGAAGCAGGCGACACTACCG    | GGGGGCAACAATGACAGGGTCA                                 |
| Cyp4f39       | GACTTCCGCATTACCTGTGCG     | AGAAAGTCCAAACCCATGCC                                   |
| Cyp4f40       | GGCTGTGAAGAGAACGAGC       | GGCATGGTGAAGTCTGTGA                                    |
| Cyp4v3        | TCCGAGTTTTCCATCTGTG       | CGGTGTAGTGGCTAGGGAAAT                                  |
| Cyp4x1        | TGGTCCAAAGAACTGCATCG      | TGGTGAAGTCTGGAGTACT                                    |
| Cyp4f41-ps    | AGAACTGAGTTATCAGTTTCCG    | GTCACTGGAAAGTGCACCG                                    |
| Ephx1         | AGGCATCCAGCAAGAAAGT       | AGATGAGAGACCCCGAGTGG                                   |
| Fmo1          | AAAACAAGCATAGCGGTTTG      | ATCCGGTTTTGCGTTGATAG                                   |
| Fmo2          | AATGGCAAGAAGGTTGTGG       | TCAGTCTTTTGAAGCAGGT                                    |
| Fmo3          | GGGGGAAAAGTTCAATGGT       | CCTGGGATCCTTGAGAAACA                                   |
| Fmo4          | CGCCGACACTTCTCTGAAAC      | AAATGTGGCTCAGGAATTG                                    |
| Fmo5          | ACAGGGCTCTGAGTCAGCAT      | CCTGGAGCCTCCTCAATA                                     |
| Fmo6          | ACTGAAAAGGAAAGCAAGCA      | GTAGGCCTTGCCTGAAAG                                     |
| Fmo9          | GAGGAGCGTGAGAAAACGTC      | AAGGACTTGAAGTGGCAGGTG                                  |
| Gsta1         | CGCCACCAATATGACCTCT       | TTGCCAATCTTTTAGTCA                                     |
| Gsta3         | TACTTTGATGGCAGGGGAAG      | GCACCTTGTGGAACATCAGA                                   |
| Gsta4         | TGATGATGATCCCTGGCT        | ACGAGAAAAGCCTCTCCGTG                                   |
| Gstm1         | CTCCGACTTTGACAGAAGC       | TTGCTCGGTGATCTTGTG                                     |
| Gstm2         | ATGTTTTGCAGGGAACAAGT      | CTCAGGCCCTCAAAGCGAC                                    |
| Gstm3         | AGAGGAGGAGAGGATCCGTG      | GGGACTGCAGCAGACTATCAT                                  |
| Gstm4         | TATGACACTGGGTACTGGGACATC  | TCACCGGAATCTTCTTCC                                     |
| Gsto1         | ATTGATGCCAAGCCTACCG       | CAGTGAGGGGAAACAGCATT                                   |
| Gstpi         | TGGGATCTGAAGCCTTTTG       | GATCTGGTCAACCACGATGAA                                  |
| Gstt1         | CTTGCTTACCTGGCACACA       | CTTCTCCGAAGGCCGTATG                                    |
| Gstt2         | GTACCAGGTGGCAGACACT       | GTTCGAGAACCAGGACCATT                                   |
| Gstt3         | TCCAGCTGGTACCATAGAG       | ACACTCTCTGCCAAGCAGAA                                   |
| Nqo1          | TATCTTCCGAGTCACTTAGCA     | TCTGCAGTTCACAGTCTTCTG                                  |
| Paps2         | ACCTTGGAGACCAGAGTTT       | TTCTGGCAACAATGAACCA                                    |
| Por           | GGCAAGGAGCTGTACTGAG       | CGACAGGCAATGSAATAGT                                    |
| Sult1a1       | GGATGTAGCTGAGCCAGAGG      | CAGCTCCAGTGGCATTTAT                                    |
| Sult1b1       | GGTGGAAAAGGGAAGAG         | AAGGCCTTCTCCTCAAGGT                                    |
| Sult1d1       | GCCGTCTCTGGAATAGTGA       | TTCCCAACAGCTCTTCACAT                                   |
| Sult1e1       | TCCGTATGTTCTGGTATGA       | GTGAAACGATCTGTCCACAG                                   |
| Sult2a1       | ATTTGGAACCGCTCACCCCTGGATA | GCCTGGCCCTTGAAGTGAAGAAA                                |
| Sult2b1       | AAGGCATTTCTAGCTCAA        | GAAGGAACTGTGCGGGTGA                                    |
| Sult3a1       | GGACCTCAGAACTCAGTGC       | TTTGTCTTGGGTGAGCTTT                                    |
| Sult5a1       | CCAGTCCAAGTGGTGGT         | AGACAGGGTGTAGCATGG                                     |
| Ugt1a1        | CACCTGAAGCCTCAATACAT      | CAGTCCGTCAAGTCCACC                                     |
| Ugt1a5        | ACACCGSAACTAGACCATG       | ATACCATGGAGCCAGAGTG                                    |
| Ugt1a6        | ATACCATGGAGCCAGAGTG       | ACCAAGACTGTGAGGGTTGG                                   |
| Ugt1a7        | TCTCAACCTGCCCTGTCTG       | GTGGCTGAGAATTTGGTGT                                    |
| Ugt1a9        | CTGGTTCAGCCAGAGTTTC       | TTGGCCACAATTAATCCACA                                   |
| Ugt2a3        | CCCAGAAGTTTTTGGGAGA       | CCACCATGTGTGATGAAAGC                                   |
| Ugt2b1        | CTACAAGTGGATCCCCAGA       | AGGAATGCCATGTAGATCG                                    |
| Ugt2b3a       | AGCTGCCAAAGCAGTCAATT      | GCCAGGATCACATCAAGCT                                    |
| Ugt2b3b       | GCTCAACTGCTCCAGATTCC      | GGCCACCTAATCTGACAAA                                    |
| Ugt2b3c       | TGTGGGAAGGTGTGTATGG       | TCCACAGCTTTGCAAAAATAA                                  |
| Ugt2b3d/37/38 | GTGGGCCACACAGTGTCTAT      | GTAAACAGCTGCTCCTTTGGC                                  |
| Ugt2b5        | ATGTTGGAGACTCCATTGC       | TTGCGTTGGCTTTTCTCT                                     |

**Table s3. ChIP-qPCR primers, targeted genomic regions and motifs.**

| Targeted genomic regions   | qPCR primer sequences                                                                                   | Antibody used | Motifs       |
|----------------------------|---------------------------------------------------------------------------------------------------------|---------------|--------------|
| Site 1. Cyp3a11, upstream  | Forward: CCAGGGATCAAGCCAGTAGATG<br>Reverse: CACAGAAATGTTAGCTCAAAGTA                                     | PXR           | DR-3<br>DR-4 |
| Site 2. Cyp3a11, upstream  | Forward: CATCTACCCTGCAATGTTGTGAG<br>Reverse: TAGAACAAACATGGTCTCTTGGAT                                   | PXR           | DR-3         |
| Site 3. Cyp3a25, upstream  | Forward: GCCACTTGACAAATGCTCG<br>Reverse: TAGTGCCAATAGATGGATTGAGC                                        | PXR           | ER-6         |
| Site 4. Cyp3a25, upstream  | Forward: TGGCCCGGGTTAAACATCAA<br>Reverse: TCAGACCACATGTCTACCCCT                                         | PXR           | DR-3         |
| Site 5. Cyp3a59            | Forward: AGCGTTGGTGTGTCCCTAGTG<br>Reverse: AACAGAGAACTGGACTGACCAC                                       | PXR           | DR-4<br>ER-6 |
| Site 6. Cyp4a10, upstream  | Forward: GGGTGACAAATGGGTTCTTGGATA<br>Reverse: AGCAAAGGGCAATGGAATAACT                                    | PPAR $\alpha$ | DR-1         |
| Site 7. Cyp4a10, in gene   | Forward: TTCTTAGAAAGACATGGGTATGCCA<br>Reverse: TCTGAGAGTCTGTGGATGG                                      | PPAR $\alpha$ | DR-2         |
| Site 8. Cyp4a31            | Forward: CCACGCCTTGATGTATTCTGA<br>Reverse: TCGAGGTGTGGAAAAGACACAC                                       | PPAR $\alpha$ | DR-2         |
| Site 9. Cyp4a31, in gene   | Forward: AGTCCACTACCTTATCTTTCCCTCA<br>Reverse: TTATGCTCACCTGATCGCCC                                     | PPAR $\alpha$ | DR-1         |
| Site 10. Cyp4a32, upstream | Forward: TGTCCTTCATTTAGGGGTGA<br>Reverse: TGCACATTGTACTCTTCTCCTC                                        | PPAR $\alpha$ | DR-1         |
| Cyp3a11 promoter           | Forward: TCCTCCTCAATGCTTCCCTC<br>Reverse: GGTC AAGTTGGCTGTGGAT                                          | RNA-Pol-II    | TATA box     |
| Cyp3a25 promoter           | *Forward: GGGGATGAGCTCCATCTTAGC<br>Reverse: ACACCAGACCTACAAGTTCGAG<br>*Also recognizes Cyp3a57/59 genes | RNA-Pol-II    | TATA box     |
| Cyp3a59 promoter           | Forward: ACAAATGCCAGGTGGAGAGG<br>*Reverse: TTCAGGCCTCCAAGTTTCCC<br>*Also recognizes Cyp3a25/57 genes    | RNA-Pol-II    | TATA box     |
| Cyp4a14 promoter           | Forward: TCACTAAATGTTTAGAAACCCGC<br>Reverse: CATTCCCCCTCCCACAAGTAG                                      | RNA-Pol-II    | TATA box     |
| Cyp4a32 promoter           | Forward: AGCTCTACAAGTCCAAGACA<br>Reverse: ATCTACTGTTAGTCTACCAAGGC                                       | RNA-Pol-II    | TATA box     |

### Supplemental Figure and Table Legends:

**Figure s1.** The 16S rRNA abundance of universal bacteria, as well as the 8 bacterial components in VSL3, namely *B. breve*, *B. infantis*, *B. longum*, *L. acidophilus*, *L. bulgaricus*, *L. plantarum*, *L. paracasei*, and *S. thermophilus*, in the VSL3 DNA. DNA from VSL3 was extracted as described in MATERIALS AND METHODS, and was loaded in each well of the qPCR reactions at 1ng, 3ng, 10ng, and 30ng. Results are expressed as delta-delta cycle value (calculated as  $2^{-(Cq - \text{average reference } Cq)}$ ) of the quantitative PCR (ddCq) as compared to the universal bacteria.

**Figure s2.** The mRNA expression of the Cyp4f gene cluster (namely Cyp4f17, 4f16, 4f37, 4f15, 4f14, 4f13, 4f39, and 4f41-ps) in liver samples from CV, CV+VSL3, GF, GF+VSL3, and GF+CV groups. The genomic locations of the Cyp4f genes are displayed using the Integrated Genome Viewer (IGV). RT-qPCR for each gene was performed as described in MATERIALS AND METHODS. Data are expressed as % of the housekeeping gene 18S rRNA. Statistical analysis was performed using ANOVA followed by Duncan's Post Hoc Test with  $p < 0.05$  considered statistically significant. Treatment-groups that are not statistically different are labeled with the same letter.

**Figure s3.** The mRNA expression of other phase-I enzymes, namely Cyp2b10, Cyp3a13, Aldh1a7, Aldh4a1, Aldh7a1, Ces2c, and Ces3a, in liver samples from CV, CV+VSL3, GF, GF+VSL3, and GF+CV groups. RT-qPCR for each gene was performed as described in MATERIALS AND METHODS. Data are expressed as % of the housekeeping gene 18S rRNA. Statistical analysis was performed using ANOVA followed by the Duncan's Post Hoc Test with  $p < 0.05$  considered statistically significant. Treatment-groups that are not statistically different are labeled with the same letter.

**Figure s4.** The mRNA expression of other phase-I enzymes, namely Fmo1, Fmo2, Fmo4, Akr1b8, Akr1c13, Akr1c19, Akr1d1, Ephx1, and Nqo1, in liver samples from CV, CV+VSL3, GF, GF+VSL3, and GF+CV groups. RT-qPCR for each gene was performed as described in MATERIALS AND METHODS. Data are expressed as % of the housekeeping gene 18S rRNA. Statistical analysis was performed using ANOVA followed by the Duncan's Post Hoc Test with  $p < 0.05$  considered statistically significant. Treatment-groups that are not statistically different are labeled with the same letter.

**Figure s5.** The mRNA expression of other phase-II Gst enzymes, namely Gsta1, Gsta3, Gsta4, Gstm4, Gstt1, Gstt2, and Gstt3, in liver samples from CV, CV+VSL3, GF, GF+VSL3, and GF+CV groups. RT-qPCR for each gene was performed as described in MATERIALS AND METHODS. Data are expressed as % of the housekeeping gene 18S rRNA. Statistical analysis was performed using ANOVA followed by the Duncan's Post Hoc Test with  $p < 0.05$  considered statistically significant. Treatment-groups that are not statistically different are labeled with the same letter.

**Figure s6.** The mRNA expression of other phase-II Ugt and Sult enzymes, namely Ugt1a1, Ugt1a5, Ugt1a6, Ugt1a7, Ugt2b5, Ugt2b34, Ugt2b35, Ugt2b36, Sult1a1, Sult1b1, Sult1d1, and Papss2 (enzyme that produces the co-substrate for sulfation reactions), in liver samples from CV, CV+VSL3, GF, GF+VSL3, and GF+CV groups. RT-qPCR for each gene was performed as described in MATERIALS AND METHODS. Data are expressed as % of the housekeeping gene 18S rRNA. Statistical analysis was performed using ANOVA followed by the Duncan's Post Hoc Test with  $p < 0.05$  considered statistically significant. Treatment-groups that are not statistically different are labeled with the same letter.

**Figure s7.** Genomic locations of positive PXR (A) and PPAR $\alpha$  (B) DNA binding sites to the *Cyp3a* (A) and *Cyp4a* (B) gene clusters, respectively. These binding sites were re-analyzed based on previously published ChIP-Seq experiments (Cui et al., 2010; Lee et al., 2014).

**Table s1.** Primer Sequences and Specificity for the bacterial 16S rRNA quantification.

**Table s2:** RT-qPCR primer sequences.

**Table s3.** ChIP-qPCR primers, targeted genomic regions and motifs.
